# Supplementary material for: Apolipoproteins—New Biomarkers of Overweight and Obesity among Childhood Acute Lymphoblastic Leukemia Survivors?
Source: MDPI journal article supplement (doi:10.3390/ijms231810634), 2022-09-13
Supplement: s1 [file s1]

**Table S1.** Characteristics of patients with acute lymphoblastic leukemia (ALL) according to gender. Data are presented as mean  $\pm$  standard deviation (SD).

|                | Total<br><i>n</i> =58 | Females<br><i>n</i> =27 | Males<br><i>n</i> =31 | <i>p</i> -value<br>(females<br>vs. males) |
|----------------|-----------------------|-------------------------|-----------------------|-------------------------------------------|
| TAG (mg/dl)    | 97.65 $\pm$ 48.18     | 95.77 $\pm$ 51.94       | 100.50 $\pm$ 43.17    | 0.543                                     |
| Apo-A1 (mg/dl) | 259.55 $\pm$ 125.56   | 284.74 $\pm$ 131.92     | 231.56 $\pm$ 114.02   | 0.111                                     |
| Apo-A2 (mg/dl) | 24.75 $\pm$ 6.39      | 25.09 $\pm$ 6.20        | 24.34 $\pm$ 6.70      | 0.877                                     |
| Apo-B (mg/dl)  | 61.15 $\pm$ 14.86     | 60.43 $\pm$ 14.71       | 61.99 $\pm$ 15.29     | 0.700                                     |
| Apo-C1 (mg/dl) | 20.50 $\pm$ 6.62      | 20.37 $\pm$ 7.22        | 20.65 $\pm$ 6.00      | 0.878                                     |
| Apo-C3 (mg/dl) | 5.33 $\pm$ 1.95       | 5.47 $\pm$ 1.97         | 5.18 $\pm$ 1.94       | 0.596                                     |
| Apo-D (mg/dl)  | 3.61 $\pm$ 0.67       | 3.71 $\pm$ 0.58         | 3.51 $\pm$ 0.75       | 0.411                                     |
| Apo-E (mg/dl)  | 2.71 $\pm$ 1.09       | 2.69 $\pm$ 1.05         | 2.73 $\pm$ 1.15       | 0.890                                     |
| Apo-H (mg/dl)  | 41.56 $\pm$ 10.44     | 43.02 $\pm$ 9.35        | 39.93 $\pm$ 11.49     | 0.544                                     |
| Apo-J (mg/dl)  | 11.10 $\pm$ 3.50      | 11.36 $\pm$ 2.82        | 10.82 $\pm$ 4.17      | 0.482                                     |
| CRP (mg/dl)    | 0.85 $\pm$ 0.85       | 0.82 $\pm$ 0.70         | 0.89 $\pm$ 1.00       | 0.785                                     |

**Table S2.** Characteristics of patients with acute lymphoblastic leukemia (ALL) according to radiotherapy. Data are presented as mean  $\pm$  standard deviation (SD).

|                | Radiotherapy<br><i>n</i> =9 | Non-radiotherapy<br><i>n</i> =49 | <i>p</i> -value |
|----------------|-----------------------------|----------------------------------|-----------------|
| TAG (mg/dl)    | 131.00 $\pm$ 58.08          | 90.03 $\pm$ 43.03                | 0.059           |
| Apo-A1 (mg/dl) | 261.03 $\pm$ 140.56         | 251.88 $\pm$ 114.88              | 0.834           |
| Apo-A2 (mg/dl) | 24.84 $\pm$ 6.96            | 24.27 $\pm$ 6.08                 | 0.988           |
| Apo-B (mg/dl)  | 63.42 $\pm$ 20.89           | 60.16 $\pm$ 13.70                | 0.555           |
| Apo-C1 (mg/dl) | 21.27 $\pm$ 5.26            | 19.86 $\pm$ 6.58                 | 0.547           |
| Apo-C3 (mg/dl) | 6.06 $\pm$ 2.28             | 5.03 $\pm$ 1.71                  | 0.127           |
| Apo-D (mg/dl)  | 3.76 $\pm$ 0.57             | 3.53 $\pm$ 0.63                  | 0.409           |
| Apo-E (mg/dl)  | 3.30 $\pm$ 1.76             | 2.56 $\pm$ 0.88                  | 0.232           |
| Apo-H (mg/dl)  | 43.88 $\pm$ 6.48            | 40.36 $\pm$ 10.42                | 0.283           |
| Apo-J (mg/dl)  | 12.52 $\pm$ 3.96            | 10.61 $\pm$ 3.11                 | 0.114           |
| CRP (mg/dl)    | 1.26 $\pm$ 1.62             | 0.78 $\pm$ 0.61                  | 0.381           |

**Table S3.** Spearman rank correlation of apolipoprotein in patients with acute lymphoblastic leukemia (ALL) depending on selected basic parameters.

| Variable                 |        | Spearman r | <i>p</i> -value | 95% confidence interval |
|--------------------------|--------|------------|-----------------|-------------------------|
| BMI (kg/m <sup>2</sup> ) | Apo-A1 | 0.22       | 0.282           | -0.19 – 0.57            |
|                          | Apo-A2 | 0.30       | 0.145           | -0.12 – 0.63            |
|                          | Apo-B  | 0.31       | 0.117           | -0.09 – 0.63            |
|                          | Apo-C1 | 0.26       | 0.203           | -0.15 – 0.59            |
|                          | Apo-C3 | 0.60       | 0.001           | 0.27 – 0.81             |
|                          | Apo-D  | 0.56       | 0.003           | 0.21 – 0.78             |
|                          | Apo-E  | 0.37       | 0.063           | -0.03 – 0.67            |
|                          | Apo-H  | 0.49       | 0.010           | 0.12 – 0.74             |
|                          | Apo-J  | 0.41       | 0.037           | 0.01 – 0.69             |
|                          | CRP    | 0.47       | 0.016           | 0.09 – 0.73             |
| WHR                      | Apo-A1 | -0.12      | 0.570           | -0.50 – 0.30            |
|                          | Apo-A2 | 0.11       | 0.602           | -0.32 – 0.50            |
|                          | Apo-B  | 0.25       | 0.219           | -0.17 – 0.60            |
|                          | Apo-C1 | 0.16       | 0.437           | -0.26 – 0.53            |
|                          | Apo-C3 | 0.04       | 0.852           | -0.37 – 0.44            |
|                          | Apo-D  | 0.16       | 0.434           | -0.26 – 0.53            |
|                          | Apo-E  | 0.06       | 0.779           | -0.35 – 0.45            |
|                          | Apo-H  | 0.07       | 0.753           | -0.35 – 0.46            |
|                          | Apo-J  | 0.01       | 0.950           | -0.39 – 0.42            |
|                          | CRP    | 0.38       | 0.059           | -0.03 – 0.68            |
| Age at diagnosis (years) | Apo-A1 | -0.32      | 0.104           | -0.64 – 0.08            |
|                          | Apo-A2 | -0.16      | 0.443           | -0.53 – 0.26            |
|                          | Apo-B  | 0.07       | 0.717           | -0.33 – 0.46            |
|                          | Apo-C1 | 0.08       | 0.699           | -0.33 – 0.46            |
|                          | Apo-C3 | 0.16       | 0.444           | -0.26 – 0.52            |
|                          | Apo-D  | 0.23       | 0.256           | -0.18 – 0.57            |
|                          | Apo-E  | -0.07      | 0.744           | -0.45 – 0.34            |
|                          | Apo-H  | 0.17       | 0.415           | -0.25 – 0.53            |

|            |        |       |       |              |
|------------|--------|-------|-------|--------------|
|            | Apo-J  | -0.07 | 0.736 | -0.45 – 0.34 |
|            | CRP    | 0.32  | 0.104 | -0.08 – 0.64 |
| SBP (mmHg) | Apo-A1 | -0.06 | 0.757 | -0.45 – 0.34 |
|            | Apo-A2 | 0.08  | 0.708 | -0.34 – 0.47 |
|            | Apo-B  | 0.22  | 0.276 | -0.19 – 0.57 |
|            | Apo-C1 | 0.32  | 0.114 | -0.09 – 0.63 |
|            | Apo-C3 | 0.46  | 0.018 | 0.08 – 0.72  |
|            | Apo-D  | 0.35  | 0.077 | -0.05 – 0.66 |
|            | Apo-E  | 0.32  | 0.107 | -0.08 – 0.64 |
|            | Apo-H  | 0.36  | 0.071 | -0.04 – 0.66 |
|            | Apo-J  | 0.22  | 0.277 | -0.19 – 0.57 |
|            | CRP    | 0.32  | 0.110 | -0.09 – 0.64 |
| DBP (mmHg) | Apo-A1 | -0.13 | 0.536 | -0.50 – 0.28 |
|            | Apo-A2 | 0.23  | 0.263 | -0.19 – 0.58 |
|            | Apo-B  | 0.35  | 0.077 | -0.05 – 0.66 |
|            | Apo-C1 | 0.46  | 0.018 | 0.08 – 0.72  |
|            | Apo-C3 | 0.35  | 0.077 | -0.05 – 0.66 |
|            | Apo-D  | 0.34  | 0.087 | -0.06 – 0.65 |
|            | Apo-E  | 0.19  | 0.343 | -0.22 – 0.54 |
|            | Apo-H  | 0.36  | 0.074 | -0.05 – 0.66 |
|            | Apo-J  | 0.08  | 0.683 | -0.32 – 0.47 |
|            | CRP    | -0.04 | 0.838 | -0.43 – 0.36 |
